# Supplementary material
Source: PubMed Central journal article supplement (PMC556223)

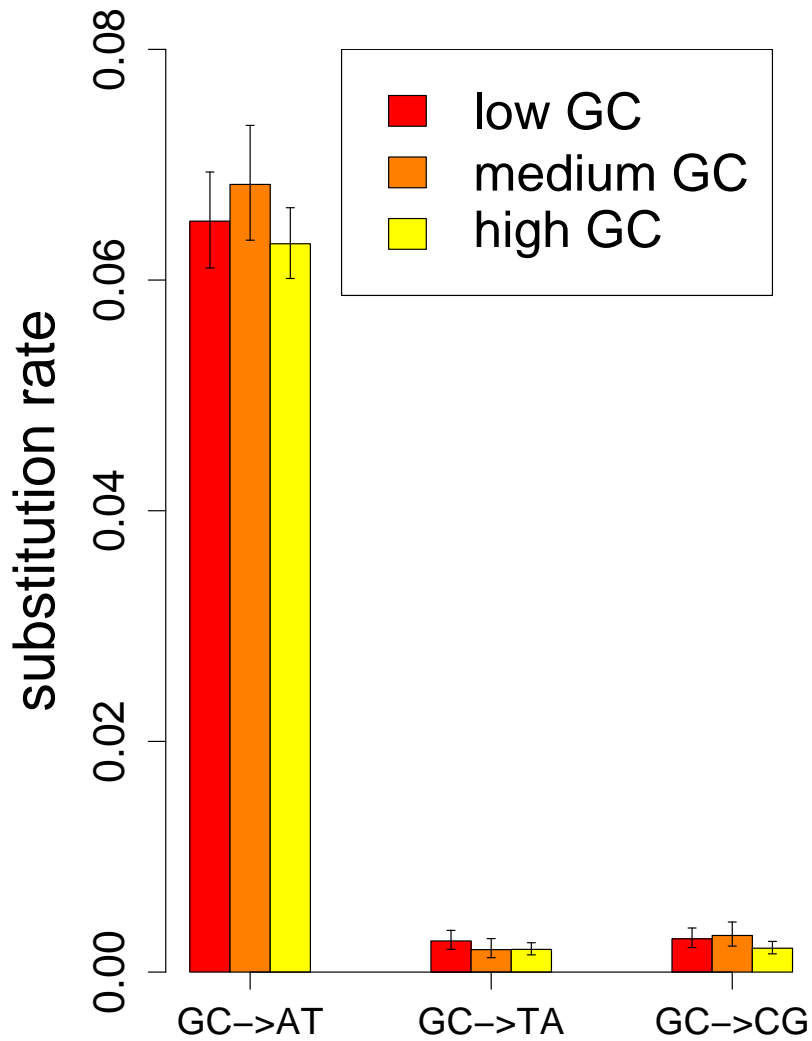

Supplement: pnas_102_15_5471__1.pdf [file pnas_102_15_5471__1.pdf]

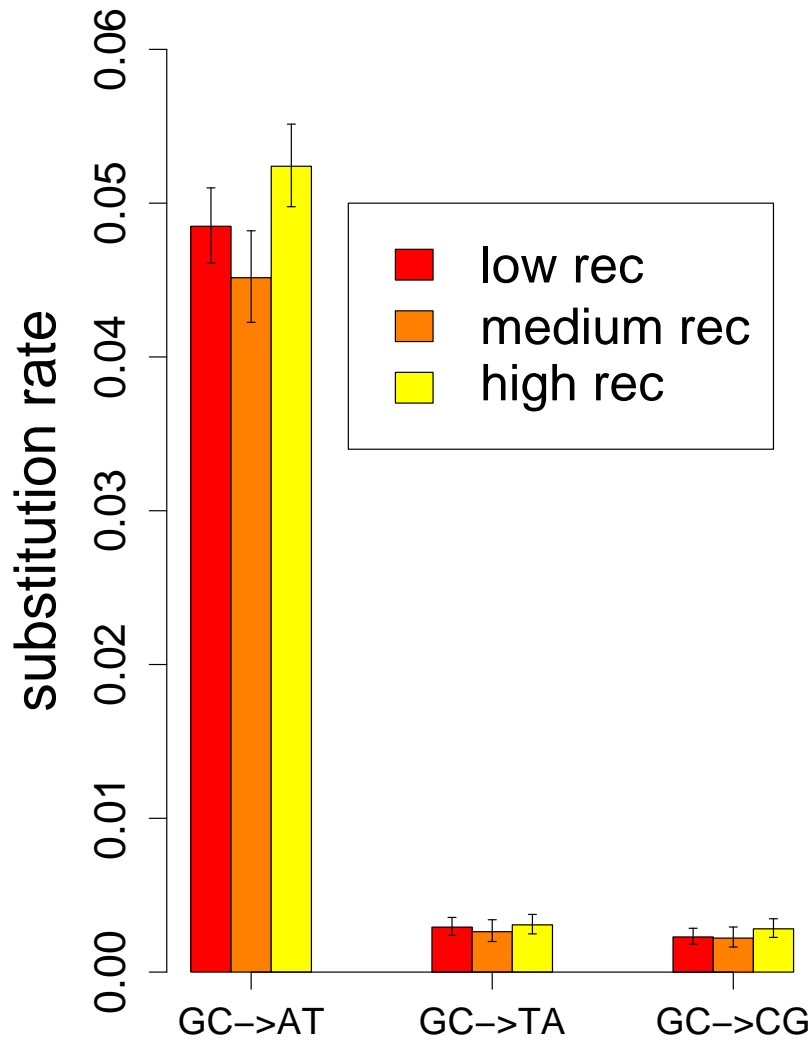

Supplement: pnas_102_15_5471__2.pdf [file pnas_102_15_5471__2.pdf]

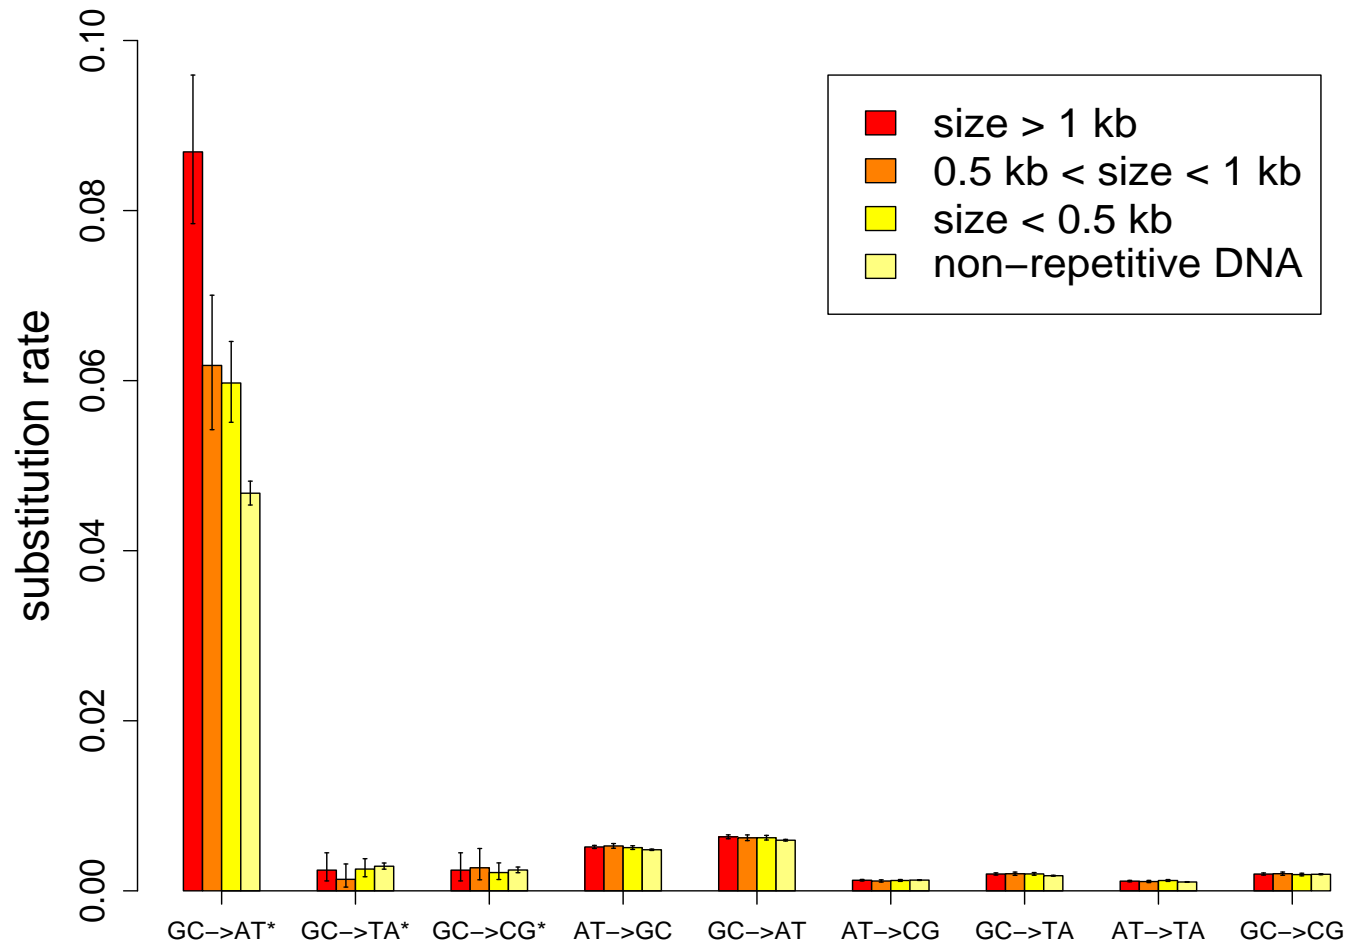

Supplement: pnas_102_15_5471__3.pdf [file pnas_102_15_5471__3.pdf]

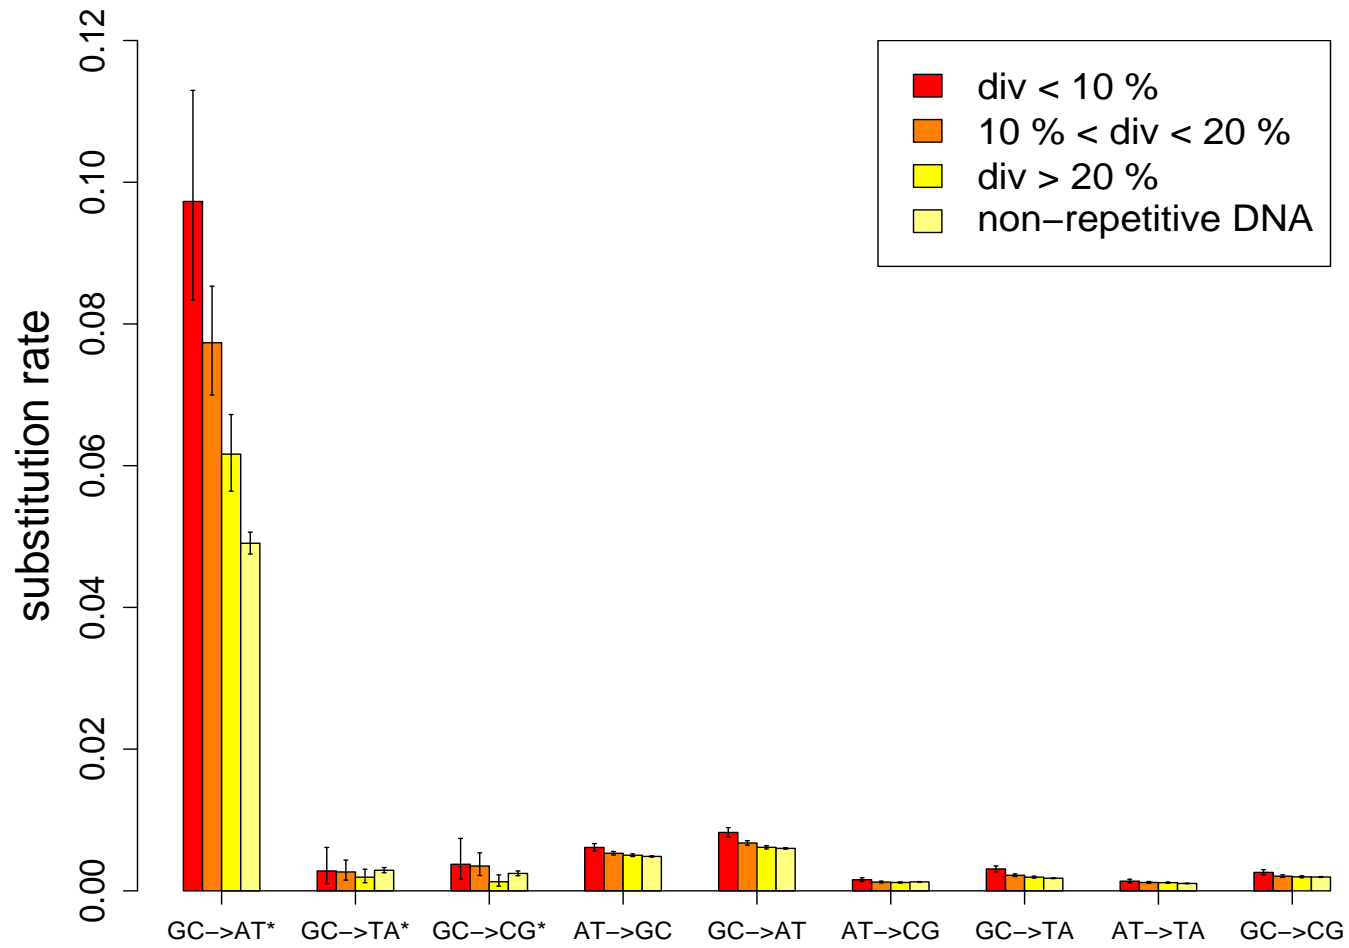

Supplement: pnas_102_15_5471__4.pdf [file pnas_102_15_5471__4.pdf]

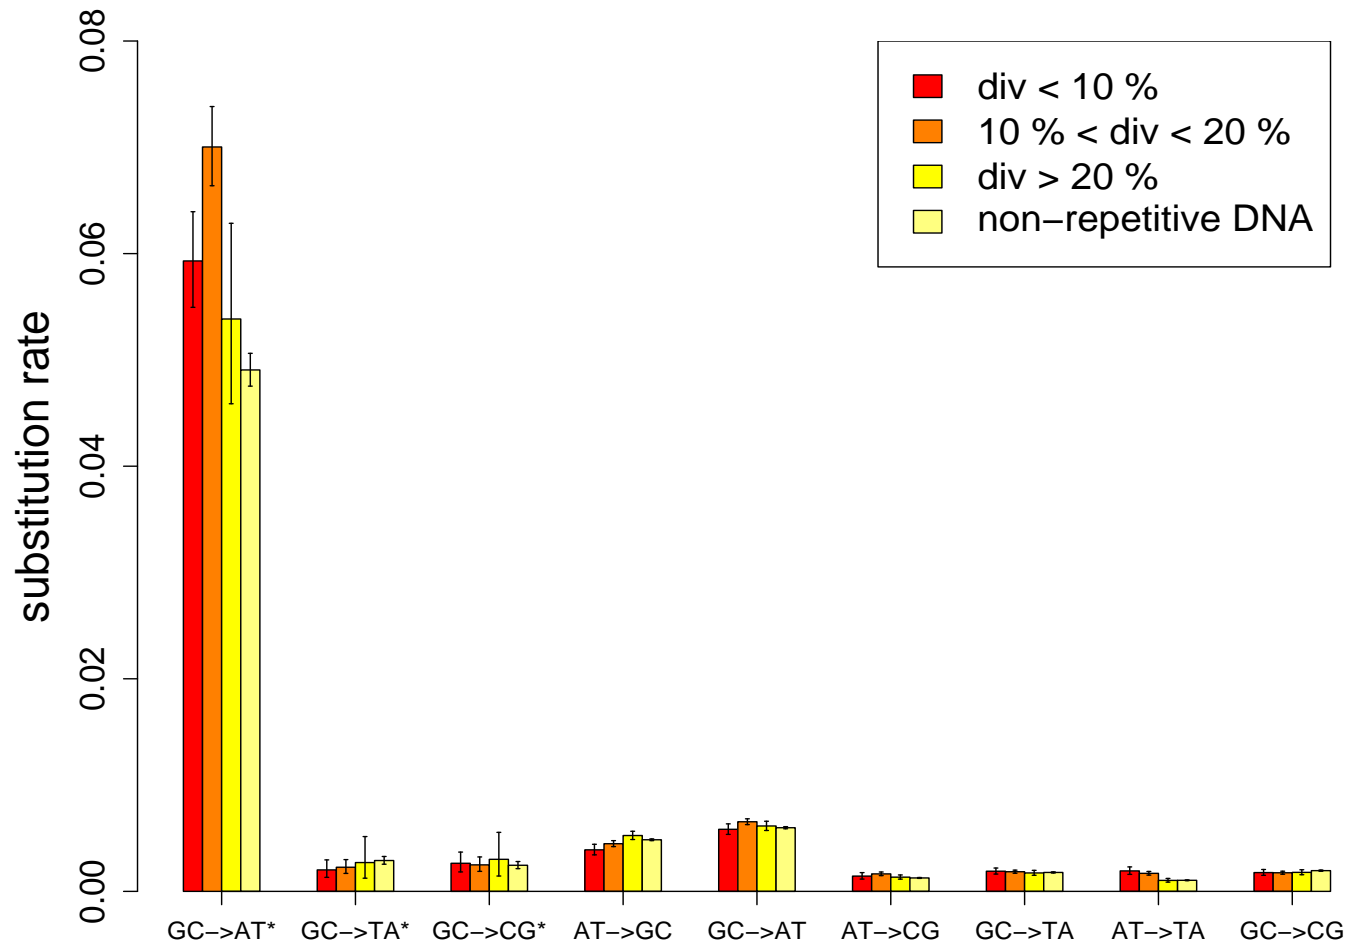

Supplement: pnas_102_15_5471__5.pdf [file pnas_102_15_5471__5.pdf]
